# Supplementary material
Source: PubMed Central journal article supplement (PMC1904121)

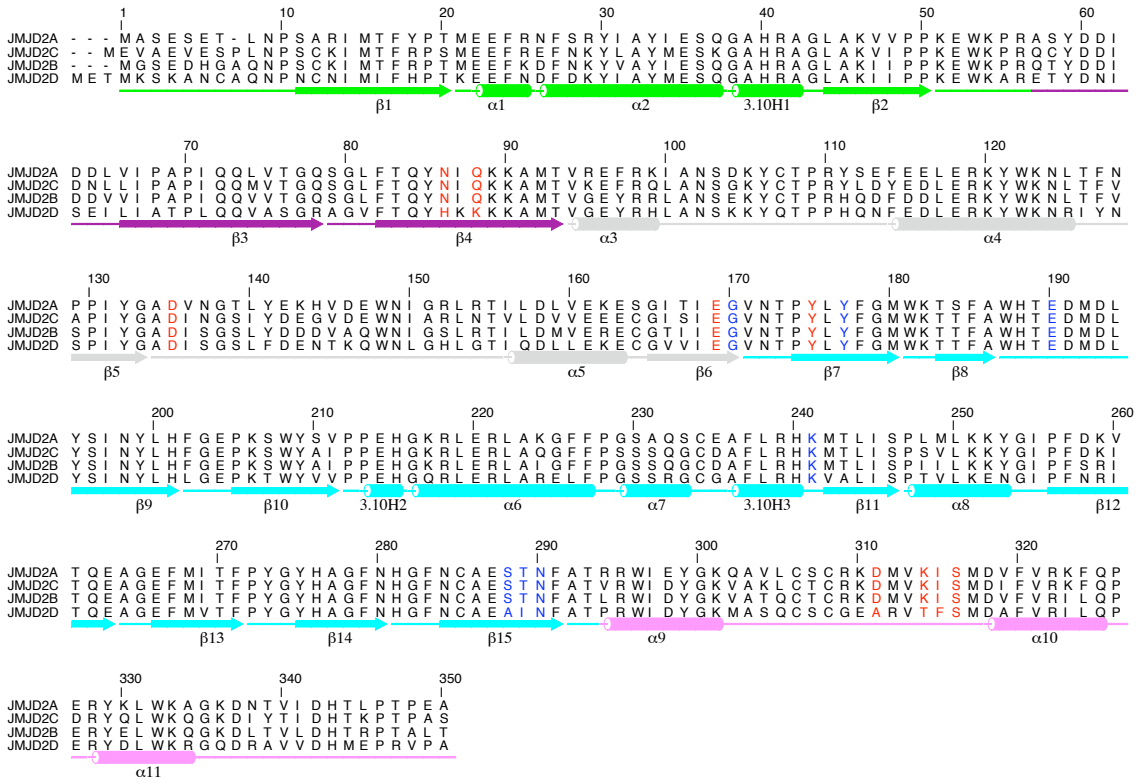

Supplement: pnas_0704525104_1.pdf [file pnas_0704525104_1.pdf]
